# Supplementary material for: Ascorbic acid induces salivary gland function through TET2/acetylcholine receptor signaling in aging SAMP1/Klotho (-/-) mice
Source: publisher site journal article supplement (doi:10.18632/aging.204213), 2022-08-11
Supplement: Supplementary file [file aging-v14i15-204213-supplementary-material-SD1.pdf]

**SUPPLEMENTARY FIGURES**

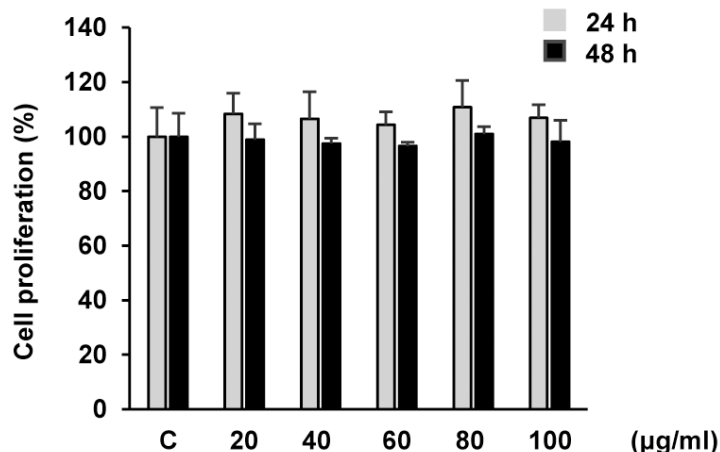

**Supplementary Figure 1. Effect of ascorbic acid on PSGC kl+/+ cell proliferation.** PSGC kl +/+ cells were treated with ascorbic acid (20-100 µg/ml) for 24 or 48 hours. Cell proliferation was evaluated by MTT assay.

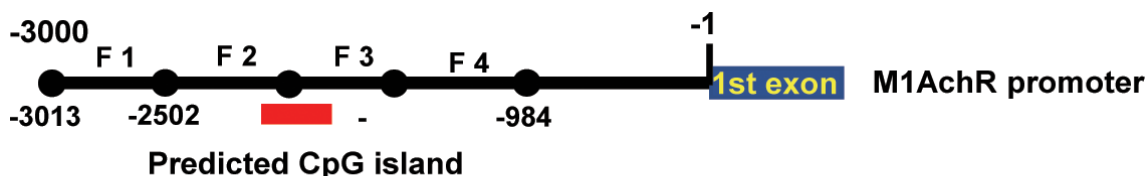

**Total Methylation rate (%)**

|                   | Fragment 1  | Fragment 2-3 (CpG island) | Fragment 4  | Total       |
|-------------------|-------------|---------------------------|-------------|-------------|
| <b>Untreated</b>  | <b>77.1</b> | <b>0.8</b>                | <b>18.2</b> | <b>32</b>   |
| <b>AA treated</b> | <b>78.8</b> | <b>1.0</b>                | <b>18.2</b> | <b>32.7</b> |

**Supplementary Figure 2. Evaluation of the DNA methylation level in the M1AChR promoter CpG region.** PSGC kl -/- cells were treated with ascorbic acid for 24 hr. After genomic DNA isolation, the methylation status of the promoter of M1AChR was analyzed by using bisulfite sequencing. Numbers with a minus sign indicate the position of the fragment (F1-F4) relative to the transcription starting site. The red box represents a CpG island in the M1AChR promoter. The percentage of methylation indicates the proportion of methylated fragments, including CpG regions.
